# Supplementary material
Source: MDPI journal article supplement (https://www.mdpi.com/2624-862X/4/1/16)
Supplement: s1 [file s1]

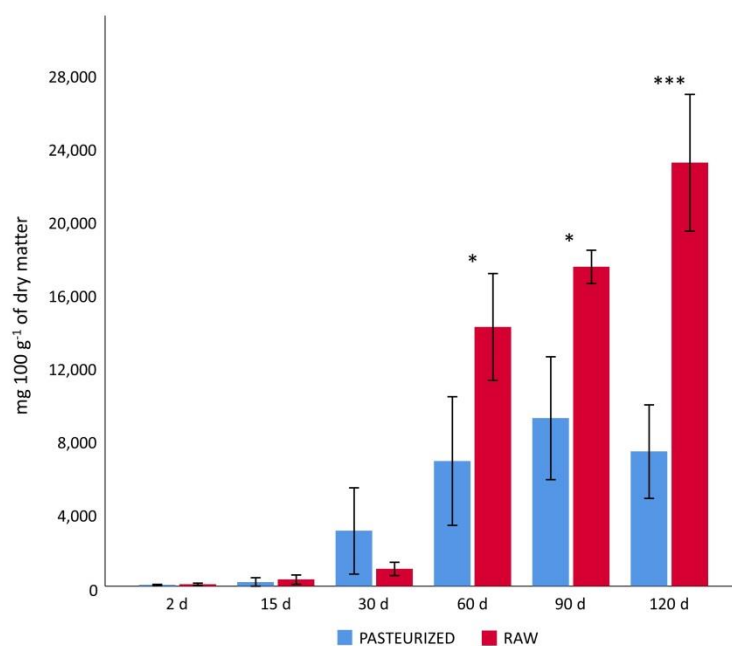

**Figure S1.** Evolution of free fatty acid concentrations (means  $\pm$  standard deviation) in Valdeón cheeses made with raw and pasteurized milk during the ripening process. Significant differences are indicated as \*:  $p < 0.05$ ; \*\*\*:  $p < 0.001$ .

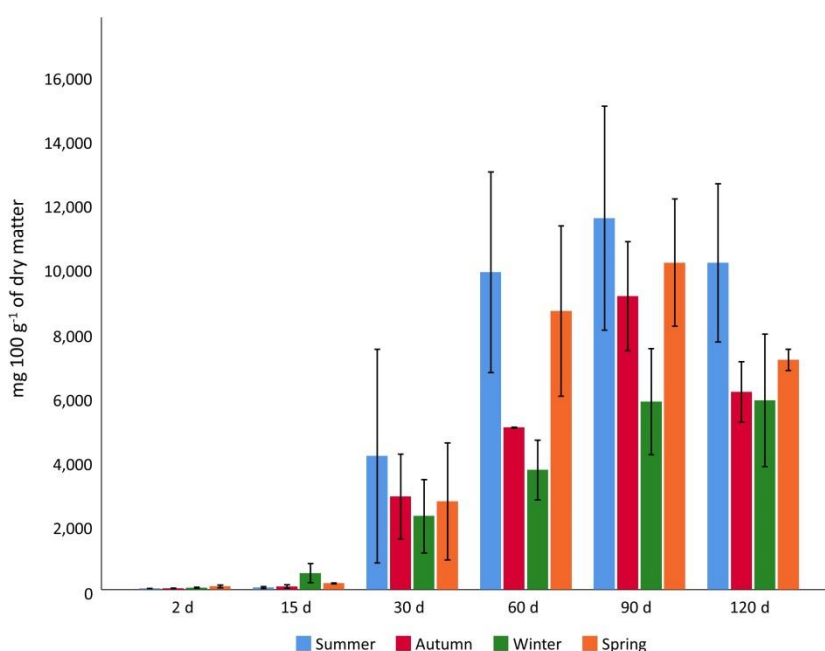

**Figure S2.** Evolution of free fatty acid concentrations (mean  $\pm$  standard deviation) during the ripening of Valdeón cheese made with pasteurized milk at different seasons of the year.

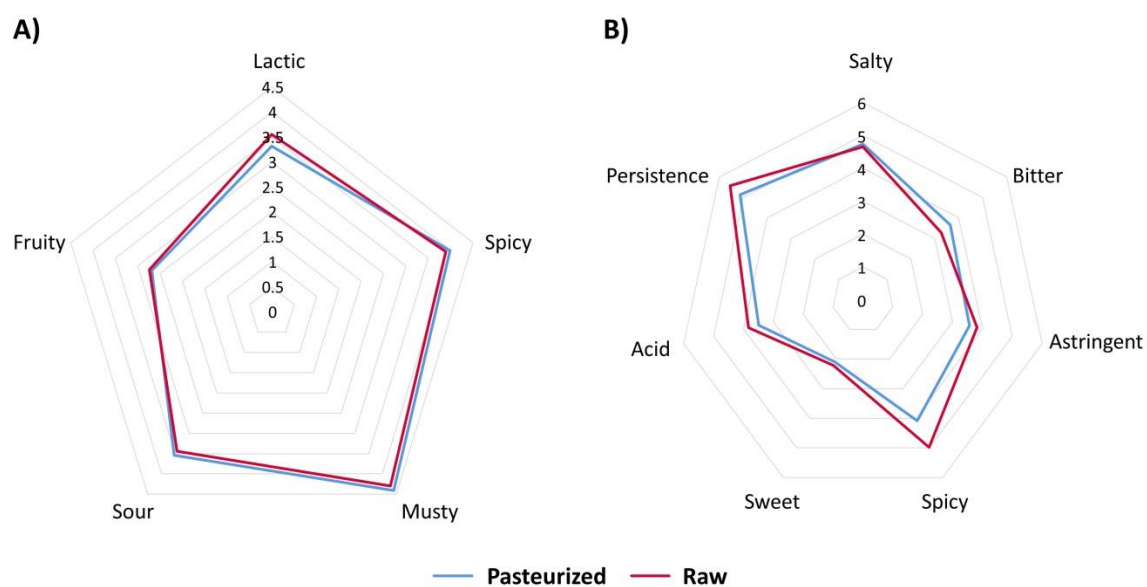

**Figure S3.** Sensory scores: (A) aroma, (B) taste of Valdeón cheese made from pasteurized or raw milk, after 120 days of ripening.
